# Supplementary material for: Genome-wide analysis of BURP genes and identification of a BURP-V gene RcBURP4 in Rosachienesis
Source: Research Square preprint supplement (doi:10.21203/rs.3.rs-309733/v1), 2021-04-02
Supplement: Supplementary file 1 [file 20c3e3e026396d88acbff05d.xlsx]

## Sheet: Sheet 1
		Numbers of BURPs in the five subfamilies from different species
		Species name	RD22-like	PG1β-like	BNM2-like	USP-like	BURP-V	BURP-VI	BURP-VII	BURP-VIII	Total
		Arabidopsis thaliana	1	3	1	0	0	0	0	0	5
		Glycine max	4	7	4	6	0	0	0	0	21
		Gossypium arboreum	1	3	7	0	6	0	0	0	17
		Gossypium hirsutum	4	6	9	0	11	0	0	0	30
		Gossypium raimondii	2	3	7	0	6	0	0	0	18
		Oryza sativa	7	2	0	0	0	2	2	1	14
		Populus trichocarpa	3	3	4	0	8	0	0	0	18
		Rosa chinensis	1	2	3	0	3	0	0	0	9
		Rosa multiflora	1	4	3	0	5	0	0	0	13
		Sorghum bicolor	1	2	0	0	0	1	6	1	11
		Zea mays	2	2	0	0	0	1	3	2	10
